# Supplementary material
Source: MDPI journal article supplement (https://www.mdpi.com/2311-7524/8/6/491)
Supplement: s1 [file s1]

Table S1. Primer sequence

| Primer         | Sequence (5'-3')                                 | Purpose                                         |
|----------------|--------------------------------------------------|-------------------------------------------------|
| SISPS-ORF-F    | GGAAACGATTGGATTAACAGTT                           | Amplification of <i>SISPS</i> CDS<br>sequence   |
| SISPS-ORF-R    | TTATCCTTTGAGTACCGCTAGT                           |                                                 |
| SISPS-QF       | CTGGTGGTCAGGTGAAGTATGTT                          | qPCR of <i>SISPS</i> gene                       |
| SISPS-QR       | TCTAGTAAGCAAGTCAACCCGATA                         | qPCR of <i>SleIF</i> gene                       |
| eIF-F          | ATCCTTCAGAGCGGTGTTCA                             |                                                 |
| eIF-R          | ATCTCAAGAGCCTCTGGTGG                             |                                                 |
| HYG-F          | TCGTTATGTTTATCGGCACCTTT                          | Identification of hygromycin<br>resistance gene |
| HYG-R          | GGGCGTCGGTTTCCACTAT                              |                                                 |
| CR-SISPS-F     | AGAATCTCTGTATTTTATAGC                            | Identification of knock-out plants              |
| CR-SISPS-R     | TACACAACGCATCAAAACAA                             |                                                 |
| SISPS1-OE-F    | AACGCCGTCAAGAACGTGAG                             | Identification of over-expression<br>plants     |
| SISPS1-OE-R    | CCTCGCAAGTTCAACAACATAC                           |                                                 |
| SISPSOE-myc-F  | AAGCTTATCGATACCGTCGACTCTC<br>TAAATTCTCTCTCACTGTC | Construction of over-expression<br>vector       |
| SISPSOE-myc-R  | GCCGCCACCGCGGTGGAGCTCTCC<br>TTTGAGTACCGCTAGTTTC  |                                                 |
| CRISPR-SISPS-F | ATTGCAGTTACTTAGAGGCGATAC                         | Construction of knock-out vector                |
| CRISPR-SISPS-R | AAACGTATCGCCTCTAAGTAACTG                         |                                                 |
